# Supplementary material for: Bio-Organically Acidified Product-Mediated Improvements in Phosphorus Fertilizer Utilization, Uptake and Yielding of Zea mays in Calcareous Soil
Source: MDPI journal article supplement (doi:10.3390/plants12173072), 2023-08-27
Supplement: s1 [file s1]

**Table S1.** Analysis of variance (Three-Way ANOVA) for determined plant's analysis

| Variable                              | Factor      | Type III<br>sum of<br>squares | Degree of<br>freedom | Mean of squares | F value | P value     |
|---------------------------------------|-------------|-------------------------------|----------------------|-----------------|---------|-------------|
| <b>Plant<br/>Height (cm)</b>          | Acid A      | 15914.5                       | 2                    | 7957.26         | 466.93  | <0.00001*** |
|                                       | P           | 4428.7                        | 2                    | 2214.35         | 129.94  | <0.00001*** |
|                                       | PSB         | 6902.0                        | 1                    | 6902.04         | 405.01  | <0.00001*** |
|                                       | Acid A*P    | 3054.4                        | 4                    | 763.61          | 44.81   | <0.00001*** |
|                                       | Acid A*PSB  | 854.1                         | 2                    | 427.04          | 25.06   | <0.00001*** |
|                                       | P*PSB       | 689.3                         | 2                    | 344.63          | 20.22   | <0.00001*** |
|                                       | AcidA*P*PSB | 362.7                         | 4                    | 90.67           | 5.32    | <0.0018**   |
| <b>Leaf<br/>Area (cm<sup>2</sup>)</b> | Acid A      | 108973                        | 2                    | 54486.3         | 743.14  | <0.00001*** |
|                                       | P           | 22238                         | 2                    | 11118.9         | 151.65  | <0.00001*** |
|                                       | PSB         | 82798                         | 1                    | 82798.3         | 1129.28 | <0.00001*** |
|                                       | Acid A*P    | 18014                         | 4                    | 4503.4          | 61.42   | <0.00001*** |
|                                       | Acid A*PSB  | 9803                          | 2                    | 4901.3          | 66.85   | <0.00001*** |
|                                       | P*PSB       | 2403                          | 2                    | 1201.3          | 16.38   | <0.00001*** |
|                                       | AcidA*P*PSB | 18506                         | 4                    | 4626.6          | 63.10   | <0.00001*** |
| <b>Root<br/>Length (cm)</b>           | Acid A      | 3889.2                        | 2                    | 1944.60         | 117.75  | <0.00001*** |
|                                       | P           | 1572.6                        | 2                    | 786.29          | 47.61   | <0.00001*** |
|                                       | PSB         | 3109.2                        | 1                    | 3109.17         | 188.26  | <0.00001*** |
|                                       | Acid A*P    | 401.4                         | 4                    | 100.36          | 6.08    | <0.00001*** |
|                                       | Acid A*PSB  | 421.3                         | 2                    | 210.63          | 12.75   | <0.00001*** |
|                                       | P*PSB       | 259.9                         | 2                    | 129.95          | 7.87    | <0.00001*** |
|                                       | AcidA*P*PSB | 565.3                         | 4                    | 141.32          | 8.56    | <0.00001*** |
| <b>Shoot<br/>Dry Weight (g)</b>       | Acid A      | 4693.37                       | 2                    | 2346.69         | 565.09  | <0.00001*** |
|                                       | P           | 466.45                        | 2                    | 233.23          | 56.16   | <0.00001*** |
|                                       | PSB         | 1896.30                       | 1                    | 1896.30         | 456.63  | <0.00001*** |
|                                       | Acid A*P    | 332.30                        | 4                    | 83.07           | 20.00   | <0.00001*** |
|                                       | Acid A*PSB  | 108.26                        | 2                    | 54.13           | 13.03   | <0.00001*** |
|                                       | P*PSB       | 111.79                        | 2                    | 55.89           | 13.46   | <0.00001*** |
|                                       | AcidA*P*PSB | 310.07                        | 4                    | 77.52           | 18.67   | <0.00001*** |
| <b>Root<br/>Dry Weight (g)</b>        | Acid A      | 507.18                        | 2                    | 253.588         | 48.43   | <0.00001*** |
|                                       | P           | 70.12                         | 2                    | 35.060          | 6.70    | 0.0034**    |
|                                       | PSB         | 315.38                        | 1                    | 315.375         | 60.23   | <0.00001*** |
|                                       | Acid A*P    | 81.35                         | 4                    | 20.338          | 3.88    | 0.0101**    |
|                                       | Acid A*PSB  | 21.58                         | 2                    | 10.792          | 2.06    | 0.1421*     |
|                                       | P*PSB       | 19.53                         | 2                    | 9.764           | 1.86    | 0.1696*     |
|                                       | AcidA*P*PSB | 21.06                         | 4                    | 5.264           | 1.01    | 0.4175*     |
| <b>Cobs<br/>Dry Weight (g)</b>        | Acid A      | 2396.33                       |                      | 1198.17         | 45.22   | <0.00001**  |
|                                       | P           | 510.78                        |                      | 255.39          | 9.64    | 0.0004***   |
|                                       | PSB         | 1300.46                       |                      | 1300.46         | 49.08   | <0.00001*** |
|                                       | Acid A*P    | 152.22                        |                      | 38.06           | 1.44    | 0.2420*     |
|                                       | Acid A*PSB  | 742.26                        |                      | 371.13          | 14.01   | <0.00001*** |
|                                       | P*PSB       | 214.93                        |                      | 107.46          | 4.06    | 0.0258**    |
|                                       | AcidA*P*PSB | 125.52                        |                      | 31.38           | 1.18    | 0.3342*     |
| <b>Cob<br/>Length (cm)</b>            | Acid A      | 139.583                       | 2                    | 69.7917         | 75.37   | <0.00001*** |
|                                       | P           | 10.028                        | 2                    | 5.0139          | 5.42    | 0.0088**    |
|                                       | PSB         | 72.338                        | 1                    | 72.3380         | 78.12   | <0.00001*** |
|                                       | Acid A*P    | 16.056                        | 4                    | 4.0139          | 4.33    | 0.0058**    |
|                                       | Acid A*PSB  | 17.954                        | 2                    | 8.9769          | 9.69    | 0.0004***   |
|                                       | P*PSB       | 4.843                         | 2                    | 2.4213          | 2.61    | 0.0870**    |



|                                                                               |             |         |   |         |        |                      |
|-------------------------------------------------------------------------------|-------------|---------|---|---------|--------|----------------------|
|                                                                               | AcidA*P*PSB | 23.574  | 4 | 5.8935  | 6.36   | 0.0006**             |
| <b>Cob Diameter (mm)</b>                                                      | Acid A      | 220.697 | 2 | 110.349 | 238.07 | <0.00001***          |
|                                                                               | P           | 17.623  | 2 | 8.811   | 19.01  | <0.00001***          |
|                                                                               | PSB         | 138.560 | 1 | 138.560 | 298.93 | <0.00001***          |
|                                                                               | Acid A*P    | 8.305   | 4 | 2.076   | 4.48   | 0.0049**             |
|                                                                               | Acid A*PSB  | 53.987  | 2 | 26.994  | 58.24  | <0.00001***          |
|                                                                               | P*PSB       | 1.734   | 2 | 0.867   | 1.87   | 0.1688*              |
|                                                                               | AcidA*P*PSB | 12.563  | 4 | 3.141   | 6.78   | <0.00001***          |
| <b>Chlorophyll Content (mg g<sup>-1</sup>)</b>                                | Acid A      | 784.06  | 2 | 392.032 | 98.81  | 0.0004***            |
|                                                                               | P           | 40.56   | 2 | 20.282  | 5.11   | 0.0111**             |
|                                                                               | PSB         | 325.12  | 1 | 325.116 | 81.94  | <0.00001**           |
|                                                                               | Acid A*P    | 96.35   | 4 | 24.088  | 6.07   | 0.0008***            |
|                                                                               | Acid A*PSB  | 159.84  | 2 | 79.921  | 20.14  | <0.00001***          |
|                                                                               | P*PSB       | 37.01   | 2 | 18.505  | 4.66   | 0.0158**             |
|                                                                               | AcidA*P*PSB | 76.57   | 4 | 19.144  | 4.82   | 0.0032**             |
| <b>Stomatal Conductance (mmol m<sup>-2</sup>s<sup>-1</sup>)</b>               | Acid A      | 8135.8  | 2 | 4067.91 | 397.23 | <0.00001**           |
|                                                                               | P           | 1316.7  | 2 | 658.37  | 64.29  | <0.00001***          |
|                                                                               | PSB         | 2041.2  | 1 | 2041.19 | 199.32 | <0.00001***          |
|                                                                               | Acid A*P    | 161.0   | 4 | 40.24   | 3.93   | 0.0095**             |
|                                                                               | Acid A*PSB  | 97.1    | 2 | 48.57   | 4.74   | 0.0148**             |
|                                                                               | P*PSB       | 289.6   | 2 | 144.81  | 14.14  | <0.00001***          |
|                                                                               | AcidA*P*PSB | 181.6   | 4 | 45.41   | 4.43   | 0.0051**             |
| <b>Photosynthetic Rate (μmol CO<sub>2</sub> m<sup>-2</sup>s<sup>-1</sup>)</b> | Acid A      | 496.68  | 2 | 248.341 | 88.68  | <0.00001**           |
|                                                                               | P           | 426.62  | 2 | 213.309 | 76.17  | <0.00001***          |
|                                                                               | PSB         | 299.86  | 1 | 299.862 | 107.07 | <0.00001***          |
|                                                                               | Acid A*P    | 128.20  | 4 | 32.049  | 11.44  | <0.00001***          |
|                                                                               | Acid A*PSB  | 2.42    | 2 | 1.210   | 0.43   | 0.6524 <sup>ns</sup> |
|                                                                               | P*PSB       | 65.11   | 2 | 32.556  | 11.62  | <0.00001***          |
|                                                                               | AcidA*P*PSB | 85.02   | 4 | 21.255  | 7.59   | <0.0001**            |
| <b>Transpirational Rate (mmol m<sup>-2</sup>s<sup>-1</sup>)</b>               | Acid A      | 19.7288 | 2 | 9.8644  | 59.86  | <0.0002**            |
|                                                                               | P           | 1.5012  | 2 | 0.7506  | 4.55   | 0.0172*              |
|                                                                               | PSB         | 13.2759 | 1 | 13.2759 | 80.56  | <0.00001***          |
|                                                                               | Acid A*P    | 0.0985  | 4 | 0.0246  | 0.15   | 0.9621 <sup>ns</sup> |
|                                                                               | Acid A*PSB  | 0.1572  | 2 | 0.0786  | 0.48   | 0.6244 <sup>ns</sup> |
|                                                                               | P*PSB       | 0.1896  | 2 | 0.0948  | 0.58   | 0.5676*              |
|                                                                               | AcidA*P*PSB | 0.3101  | 4 | 0.0775  | 0.47   | 0.7571 <sup>ns</sup> |
| <b>Water Use Efficiency (%)</b>                                               | Acid A      | 10.2570 | 2 | 5.12850 | 10.08  | <0.0003**            |
|                                                                               | P           | 3.1974  | 2 | 1.59869 | 3.14   | 0.0552*              |
|                                                                               | PSB         | 6.8908  | 1 | 6.89077 | 3.55   | <0.0008***           |
|                                                                               | Acid A*P    | 0.4321  | 4 | 0.10804 | 0.21   | 0.9298 <sup>ns</sup> |
|                                                                               | Acid A*PSB  | 6.7565  | 2 | 3.37827 | 6.64   | 0.0035**             |
|                                                                               | P*PSB       | 0.6945  | 2 | 0.34725 | 0.68   | 0.5116*              |
|                                                                               | AcidA*P*PSB | 0.4714  | 4 | 0.11786 | 0.23   | 0.9187 <sup>ns</sup> |
| <b>Shoot P (%)</b>                                                            | Acid A      | 0.22305 | 2 | 0.11153 | 209.71 | <0.00001**           |
|                                                                               | P           | 0.01291 | 2 | 0.00645 | 12.14  | 0.0001***            |
|                                                                               | PSB         | 0.09463 | 1 | 0.09463 | 177.93 | <0.00001***          |
|                                                                               | Acid A*P    | 0.00069 | 4 | 0.00017 | 0.32   | 0.8613 <sup>ns</sup> |
|                                                                               | Acid A*PSB  | 0.00097 | 2 | 0.00048 | 0.91   | 0.4126*              |
|                                                                               | P*PSB       | 0.00095 | 2 | 0.00048 | 0.90   | 0.4167*              |
|                                                                               | AcidA*P*PSB | 0.00342 | 4 | 0.00086 | 1.61   | 0.1932*              |
| <b>Root P (%)</b>                                                             | Acid A      | 0.10931 | 2 | 0.05465 | 105.19 | <0.00001***          |
|                                                                               | P           | 0.01030 | 2 | 0.00515 | 9.91   | <0.0004***           |



|                                   |             |         |   |         |        |                      |
|-----------------------------------|-------------|---------|---|---------|--------|----------------------|
| <b>Grain P (%)</b>                | PSB         | 0.05273 | 1 | 0.05273 | 101.50 | <0.00001***          |
|                                   | Acid A*P    | 0.00413 | 4 | 0.00103 | 1.99   | 0.1170*              |
|                                   | Acid A*PSB  | 0.00678 | 2 | 0.00339 | 6.52   | 0.0038**             |
|                                   | P*PSB       | 0.00225 | 2 | 0.00113 | 2.17   | 0.1293*              |
|                                   | AcidA*P*PSB | 0.00298 | 4 | 0.00075 | 1.43   | 0.2424*              |
| <b>Crude Fat (%)</b>              | Acid A      | 0.18685 | 2 | 0.09343 | 116.65 | <0.00001***          |
|                                   | P           | 0.01527 | 2 | 0.00764 | 9.53   | <0.0005***           |
|                                   | PSB         | 0.05967 | 1 | 0.05967 | 74.50  | <0.00001***          |
|                                   | Acid A*P    | 0.00519 | 4 | 0.00130 | 1.62   | 0.1908*              |
|                                   | Acid A*PSB  | 0.02153 | 2 | 0.01076 | 13.44  | <0.00001***          |
| <b>Crude Fiber (%)</b>            | P*PSB       | 0.00055 | 2 | 0.00027 | 0.34   | 0.7125 <sup>ns</sup> |
|                                   | AcidA*P*PSB | 0.00922 | 4 | 0.00230 | 2.88   | 0.0364**             |
|                                   | Acid A      | 0.84487 | 2 | 0.42244 | 246.81 | <0.00001***          |
|                                   | P           | 0.18828 | 2 | 0.09414 | 55.00  | <0.00001***          |
|                                   | PSB         | 0.39956 | 1 | 0.39956 | 233.44 | <0.00001***          |
| <b>Crude Protein (%)</b>          | Acid A*P    | 0.02219 | 4 | 0.00555 | 3.24   | 0.0227**             |
|                                   | Acid A*PSB  | 0.00558 | 2 | 0.00279 | 1.63   | 0.2098*              |
|                                   | P*PSB       | 0.00842 | 2 | 0.00421 | 2.46   | 0.0998*              |
|                                   | AcidA*P*PSB | 0.02716 | 4 | 0.00679 | 3.97   | 0.0091**             |
|                                   | Acid A      | 6.33427 | 2 | 3.16714 | 315.33 | <0.00001***          |
| <b>Ash Contents (%)</b>           | P           | 0.92280 | 2 | 0.46140 | 45.94  | <0.00001***          |
|                                   | PSB         | 1.05728 | 1 | 1.05728 | 105.27 | <0.00001***          |
|                                   | Acid A*P    | 0.12090 | 4 | 0.03022 | 3.01   | 0.0306**             |
|                                   | Acid A*PSB  | 0.08224 | 2 | 0.04112 | 4.09   | 0.0250**             |
|                                   | P*PSB       | 0.08316 | 2 | 0.04158 | 4.14   | 0.0241**             |
| <b>Thousand Grains Weight (g)</b> | AcidA*P*PSB | 0.11259 | 4 | 0.02815 | 2.80   | 0.0401**             |
|                                   | Acid A      | 20.8182 | 2 | 10.4091 | 157.42 | <0.00001***          |
|                                   | P           | 9.1463  | 2 | 4.5731  | 69.16  | <0.00001***          |
|                                   | PSB         | 8.0813  | 1 | 8.0813  | 122.22 | <0.00001***          |
|                                   | Acid A*P    | 0.8894  | 4 | 0.2224  | 3.36   | 0.0194**             |
| <b>Thousand Grains Weight (g)</b> | Acid A*PSB  | 0.0467  | 2 | 0.0234  | 0.35   | 0.7047 <sup>ns</sup> |
|                                   | P*PSB       | 1.1303  | 2 | 0.5651  | 8.55   | 0.0009***            |
|                                   | AcidA*P*PSB | 0.5759  | 4 | 0.1440  | 2.18   | 0.0912*              |
|                                   | Acid A      | 1.99339 | 2 | 0.99669 | 241.76 | <0.00001***          |
|                                   | P           | 0.77957 | 2 | 0.38979 | 94.55  | <0.00001***          |
| <b>Thousand Grains Weight (g)</b> | PSB         | 0.47508 | 1 | 0.47508 | 115.24 | <0.00001***          |
|                                   | Acid A*P    | 0.05655 | 4 | 0.01414 | 3.43   | 0.0179**             |
|                                   | Acid A*PSB  | 0.06040 | 2 | 0.03020 | 7.33   | 0.0021**             |
|                                   | P*PSB       | 0.00557 | 2 | 0.00279 | 0.68   | 0.5150 <sup>ns</sup> |
|                                   | AcidA*P*PSB | 0.03762 | 4 | 0.00940 | 2.28   | 0.0795*              |
| <b>Thousand Grains Weight (g)</b> | Acid A      | 157387  | 2 | 78693.4 | 978.06 | <0.00001***          |
|                                   | P           | 16477   | 2 | 8238.6  | 102.40 | <0.00001***          |
|                                   | PSB         | 31877   | 1 | 31876.7 | 396.19 | <0.00001***          |
|                                   | Acid A*P    | 11380   | 4 | 2845.1  | 35.36  | <0.00001***          |
|                                   | Acid A*PSB  | 1494    | 2 | 746.8   | 9.28   | 0.0006**             |
| <b>Thousand Grains Weight (g)</b> | P*PSB       | 8542    | 2 | 4270.8  | 53.08  | <0.00001***          |
|                                   | AcidA*P*PSB | 1272    | 4 | 318.1   | 3.95   | 0.0092**             |

Acid A: Acidified organic amendments; P: phosphorus sources; PSB: phosphorus solubilizing bacteria; Acid A xP: Acidified organic amendments x phosphorus; Acid A xPSB: Acidified organic amendments x phosphorus solubilizing bacteria; P xPSB: phosphorus x phosphorus solubilizing bacteria; Acid A xP xPSB: Acidified organic amendments x phosphorus x phosphorus solubilizing bacteria. Whereas \*\*\*: P<0.0001; \*\*: P<0.05; \*: P>0.05; ns: not significant.
